# Supplementary material for: ThIRST: Targeted IRrigation Support Tool for sustainable coffee production
Source: Frontiers journal article supplement (doi:10.3389/fsufs.2023.1267388), 2023-10-25
Supplement: Table_1.pdf [file Table_1.pdf]

## A. Annex – ThIRST tool's Input and output value

### A1. Soil moisture

The input values range from 1 (higher soil moisture capacity) to 5 (higher soil moisture deficit).

| Soil moisture (Farmer selection)                                                                                                              | SMD        | Input value used in ThIRST equation |
|-----------------------------------------------------------------------------------------------------------------------------------------------|------------|-------------------------------------|
| Dry, forms a very weak ball, aggregated soil grains break away easily from ball.                                                              | 14.2 - 8.3 | 5                                   |
| Slightly moist, forms a weak ball with defined finger marks, darkened colour, no water staining on fingers, grains break away.                | 10.8 - 5.8 | 4                                   |
| Moist, forms a ball with defined finger marks, very light soil/water staining on fingers, darkened colour, will not slick.                    | 7.5-2.5    | 3                                   |
| Wet, forms a ball with wet outline left on hand, light to medium water staining on fingers, makes a weak ribbon between thumb and forefinger. | 3.3 - 0.0  | 2                                   |
| Wet, forms a soft ball, free water appears briefly on soil surface after squeezing or shaking, medium to heavy soil/water coating on fingers. | 0          | 1                                   |

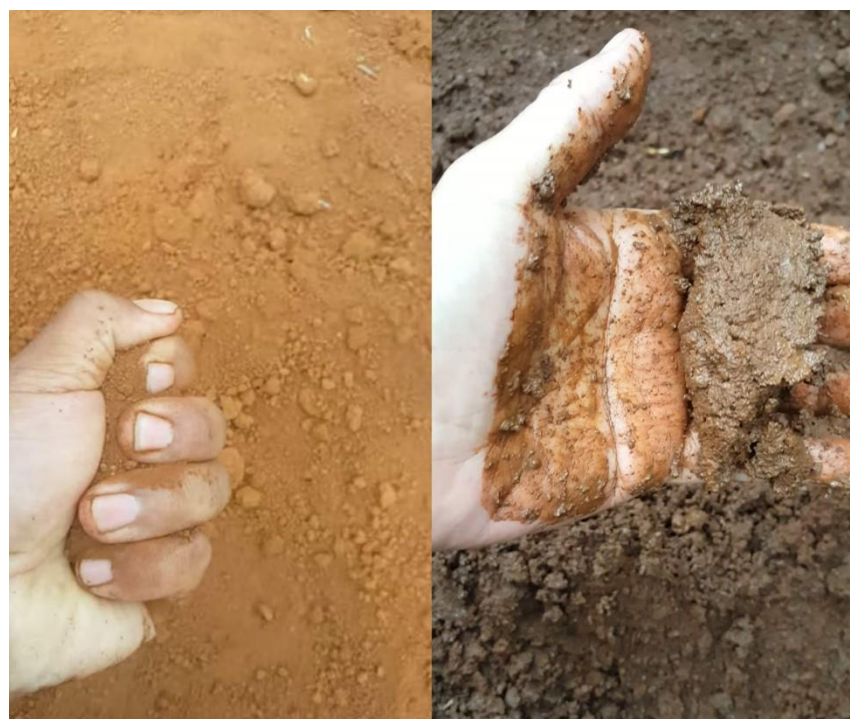

Figure A1. Screenshot from soil test instruction video conducted by SMS agronomists; Left: Dry, forms a very weak ball, aggregated soil grains break away easily from ball ( $14.2 < \text{SMD} < 8.3$ ); Right: Wet, forms a soft ball, free water appears briefly on soil surface after squeezing or shaking, medium to heavy soil/water coating on fingers ( $\text{SMD} = 0$ ).

## A2. Slope

As the slope gradient of the farm increases, the input value also increases.

| Slope gradient/ Angle (Farmer selection)                                                                     | Input value used in ThIRST equation |
|--------------------------------------------------------------------------------------------------------------|-------------------------------------|
| Completely flat (Slope = 0 % / angle=0)                                                                      | 1                                   |
| Gently sloping ( $10 \% \leq \text{slope} \leq 15 \%$ / $5.71^\circ \leq \text{angle} \leq 8.53^\circ$ )     | 3                                   |
| Moderately sloping ( $15 \% \leq \text{slope} \leq 30 \%$ / $8.53^\circ \leq \text{angle} \leq 16.7^\circ$ ) | 6                                   |
| Steeply sloping ( $30 \% \leq \text{slope} \leq 45 \%$ / $16.7^\circ \leq \text{angle} \leq 24.23^\circ$ )   | 7                                   |
| Very steeply sloping (Slope > 45 %, Angle > 24.23°)                                                          | 8                                   |

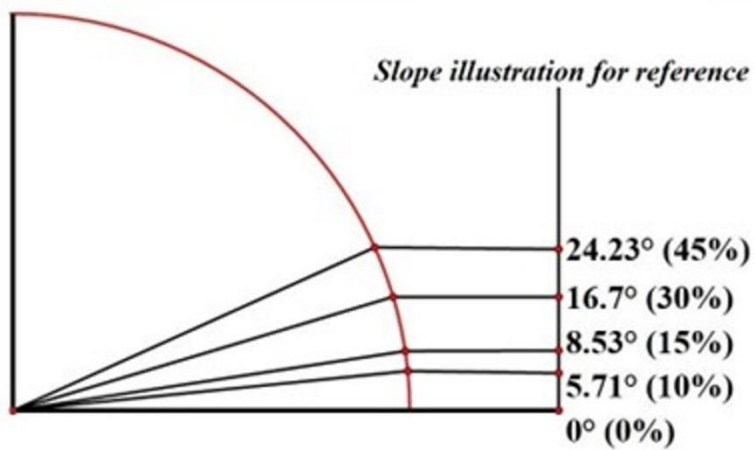

Figure A2. Slope angle illustration used to aid farmers. Screenshot from rtWork app.

### A3. Seasonal forecast

The forecast output from DeRisk SE Asia (<https://deriskseasia.org/climate.html>) is converted into input value for the ThIRST equation.

| <b>Precipitation Forecast (Backend)</b>                  | <b>Input value used in ThIRST equation</b> |
|----------------------------------------------------------|--------------------------------------------|
| 80% to 100% chance of exceeding the median precipitation | -2                                         |
| 60% to 80% chance of exceeding the median precipitation  | -1                                         |
| 40% to 60% chance of exceeding the median precipitation  | 0                                          |
| 20% to 40% chance of exceeding the median precipitation  | 1                                          |
| 0% to 20% chance of exceeding the median precipitation   | 2                                          |

#### A4. ThIRST value output

Recommendation is given based on the ThIRST value calculated by the following formula:

ThIRST value = (1) Soil moisture\*0.8 + (2) Slope\*0.5 + (3) Seasonal forecast\*0.6

| ThIRST value        | Recommendation given                                                                                                                                                           |
|---------------------|--------------------------------------------------------------------------------------------------------------------------------------------------------------------------------|
| ThIRST < or = 4     | Low ThIRST value: “Based on your farm geography and the upcoming seasonal rainfall prediction, your environments coffee thirst situation is sufficient”                        |
| 4 < ThIRST < or = 7 | Medium ThIRST value: “Based on your farm geography and the upcoming seasonal rainfall prediction: irrigation &/or the preparation for irrigation should be considered”         |
| ThIRST > 7          | Large ThIRST value: “Based on your farm geography and the upcoming seasonal rainfall prediction: irrigation &/or the preparation for irrigation should be strongly considered” |

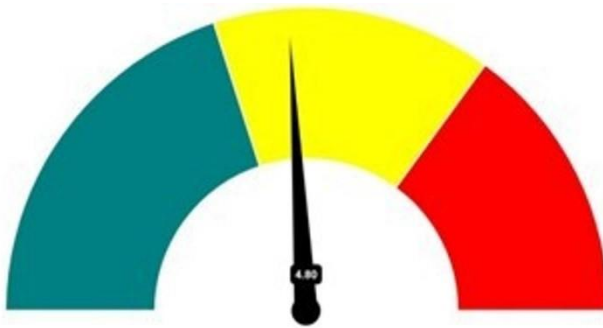

Medium ThIRST number: “Based on your farm geography and the upcoming seasonal rainfall prediction: irrigation and/& the preparation for irrigation should be considered.”

**Figure A3.** The ThIRST value is displayed in a traffic light color system, with green, yellow, and red representing low need, moderate need, and high need for irrigation, respectively.

## A5. ThIRST module - rtWork app - English version

WEFOCOS - F...

1. COFFEE FARMS 2. WEFOCOS ADVISORY

WEFOCOS ADVISORY

SOIL STATUS - THIRST MODEL

SHADE TREE ADVICE

WEFOCOS THIR...

SOIL STATUS SURVEY

Address:

Location: \*

Latitude: N 20°59'22"  
Longitude: E 105°49'50"  
Altitude: -3m  
Accuracy: 11.86m

WEFOCOS THIR...

THIRST MODEL

WEFOCOS THIR...

Steps to do soil moisture hand testing

1. Obtain a soil sample at the root zone (30-60cm) using a probe, auger, or shovel;
2. Squeeze the soil sample firmly in your hand several times to form an irregularly shaped "ball";
3. Squeeze the soil sample out of your hand between thumb and forefinger to form a ribbon;
4. Observe the soil texture, ability to ribbon, firmness and surface roughness of ball, water glistening, loose soil particles, soil/water staining on fingers, and soil color.

Which option below best describes your soil moisture? \*

☐ Dry, forms a very weak ball, aggregated soil grains break away easily from ball.

[Watch video](#)

☐ Slightly moist, forms a weak ball with defined finger marks, darkened colour, no water staining on fingers, grains break away.

[Watch video](#)

☐ Moist, forms a ball with defined finger marks. very light soil/water staining on fingers.

☐ darkened colour, will not slick.

[Watch video](#)

☐ Wet, forms a ball with wet outline left on hand, light to medium water staining on fingers, makes a weak ribbon between thumb and forefinger.

Thirst Model

Medium thirst number: "Based on your farm geography and the upcoming seasonal rainfall prediction: irrigation &/or the preparation for irrigation should be considered"

GPS:

11°45'00.0"N 108°03'...  
[View larger map](#)

Slope gradient: \*

☐ Completely flat:  
Slope = 0%  
Angle = 0°

☐ Gently sloping:  
10 % ≤ Slope ≤ 15 %  
5.71° ≤ Angle ≤ 8.53°

☐ Moderately sloping:  
15 % ≤ Slope ≤ 30 %  
8.53° ≤ Angle ≤ 16.7°

☐ Steeply sloping:  
30 % ≤ Slope ≤ 45 %  
16.7° ≤ Angle ≤ 24.23°

☐ Very steeply sloping:  
Slope > 45 %  
Angle > 24.23°

Độ dốc theo chiều

Thank you for completing our survey!

SUBMIT

Figure A4. Screenshots of the ThIRST module inside the rtWork app, English version
